# Supplementary material
Source: publisher figshare collection journal article supplement (https://tandf.figshare.com/ndownloader/files/13576196)
Supplement: Supplementary file 1 [file 13576196]

# Supporting Material

Table S1. Radiation therapy studies providing insight on the effect of age on acute radiation effects.

| **Study** | **Design/Population** | **Endpoints** | **Results/Findings** |
| --- | --- | --- | --- |
| ***Pediatric*** |  |  |  |
| Radiation-related treatment effects across the age spectrum: Differences and similarities or What the old and young can learn from each other (Krasin et al. 2010) | Adults and children. | Review comparing general differences in treatment effects in both children and adults. | Radiation related effects in children and adults limit the delivery of effective radiation doses and result in long-term morbidity affecting function. **Effects depend on the target organ.** |
| Sources, effects, and risks of ionizing radiation. (UNSCEAR 2013) | Children/ adolescents. | Review analyzing data, results, and literature of radiation effects in the pediatric population. | Generally, **children are at more risk of radiation health effects than are adults**. |
| ***Adults*** |  |  |  |
| Correlation between delivered radiation doses to the brainstem or vestibular organ and nausea & vomiting toxicity in patients with head and neck cancers – an observational clinical trial (Schiller et al. 2017) | 26 patients receiving NSCLC to the brainstem and vestibular system. | Nausea and vomiting. 65.4% experienced nausea and vomiting at least once during treatment. | Females and **younger** **aged patients were more prone to nausea and vomiting**. |
| Influence of age, prior abdominal surgery, fraction size, and dose on complications after radiation therapy for squamous cell cancer of the uterine cervix. (Lanciano et al. 1992) | 1558 patients were reviewed, with a median follow-up of 43 months. | Analysis of complications in regards to treatment by radiotherapy. | **Patients under 40 years were associated with an increase in complications** from radiotherapy as compared to those over 40. |
| ***Elderly*** |  |  |  |
| Radiation-induced organizing pneumonia after stereotactic body radiotherapy for lung tumor (Ochiai et al. 2015) | 78 patients (47 males with median age of 80 years old), median follow-up of 23 months, treatment was stereotactic body radiotherapy (SBRT). | Organizing pneumonia (OP) following stereotactic body radiotherapy. | 6.4% developed OP at 6-18 months after SBRT. 8.2% at one and two years respectively. Radiation-induced organizing **pneumonia was observed in this elderly population**. |
| Comorbidity assessment and radiotherapy in elderly cancer patients (Fiorica et al. 2012) | Review of findings from the treatment of elderly patients with non-small cell lung cancer, rectal cancer, breast, and prostate cancer. | Comparison of geriatric index of comorbidity [GIC], adult comorbidity evaluation-27 [ACE-27], cumulative illness rating scale for geriatrics [CIRS-G] and the Charlson index, cumulative illness rating scale. | Patients without or with mild comorbidities had a significantly better survival than patients with moderate/severe comorbidities. Increasing severity of **comorbidities may shorten life expectancy and increase acute toxicity.** |
| Stereotactic body radiotherapy for very elderly patients with stage I non-small cell lung cancer (Hayashi et al. 2014) | 81 patients (elderly; median age, 80 years; age range 64–93 years) with stage 1 non-small cell lung cancer. | Data from stereotactic body radiotherapy and its effects on elderly populations. | Radiotherapy was deemed feasible and efficacious in elderly but, elderly patients did experience **significantly more severe radiation pneumonitis**. |
| Greater influence of age than comorbidity on primary treatment and complications of prostate cancer patients: an in-depth population-based study (Lanciano et al. 1992) | Random sample of 505 prostate cancer patients. | Data comparing patients with and without comorbidities on prostate cancer outcomes. | Prostate cancer patients with comorbidity did not suffer from more complications but had a **worse prognosis**. |
| Symptomatic radiation pneumonitis in elderly patients receiving thoracic irradiation (Kharofa and Gore 2013) | There were 99 patients > age 70 and 157 patients age < 70 years old. | Data on incidence of pneumonitis after radiation therapy. | Elderly patients were observed to have an **increased risk of symptomatic pneumonitis.** |
| Age has no impact on acute and late toxicity of curative thoracic radiotherapy (Pignon et al. 1998) | 1208 patients in 6 age ranges from 50-70 years. | Data on acute and late toxicities. | Age has no impact on acute and late toxicity of curative thoracic radiotherapy. No correlation of age with acute nausea and weakness; **increased weight loss was associated with increased age**. |
| Radiation therapy alone in elderly with early stage non-small cell lung cancer (San Jose et al. 2006) | 33 patients RT, aged 71–97 years. | Data on radiotherapy and acute/ late high-grade toxicity. | Radiotherapy alone was effective and low toxic in elderly with early stage NSCLC. **No significant RT-related complications**; incidence of both acute and late high-grade toxicity was low and similar among all age groups. |

# References

Fiorica F, Stefanelli A, Fisichella R, Tirelli U, Berretta M. 2012. Comorbidity assessment and radiotherapy in elderly cancer patients. Eur Rev Med Pharmacol Sci. 16(11):1605-1606.

Hayashi S, Tanaka H, Kajiura Y, Ohno Y, Hoshi H. 2014. Stereotactic body radiotherapy for very elderly patients (age, greater than or equal to 85 years) with stage I non-small cell lung cancer. Radiat Oncol. 9:138.

Kharofa J, Gore E. 2013. Symptomatic radiation pneumonitis in elderly patients receiving thoracic irradiation. Clin Lung Cancer. 14(3):283-287.

Krasin MJ, Constine LS, Friedman DL, Marks LB. 2010. Radiation-related treatment effects across the age spectrum: differences and similarities or what the old and young can learn from each other. Seminars in radiation oncology. 20(1):21-29.

Lanciano RM, Martz K, Montana GS, Hanks GE. 1992. Influence of age, prior abdominal surgery, fraction size, and dose on complications after radiation therapy for squamous cell cancer of the uterine cervix. A patterns of care study. Cancer. 69(8):2124-2130.

Ochiai S, Nomoto Y, Yamashita Y, Murashima S, Hasegawa D, Kurobe Y, Toyomasu Y, Kawamura T, Takada A, Ii N. 2015. Radiation-induced organizing pneumonia after stereotactic body radiotherapy for lung tumor. J Radiat Res. 56(6):904-911.

Pignon T, Gregor A, Schaake Koning C, Roussel A, Van Glabbeke M, Scalliet P. 1998. Age has no impact on acute and late toxicity of curative thoracic radiotherapy. Radiotherapy and oncology : journal of the European Society for Therapeutic Radiology and Oncology. 46(3):239-248.

San Jose S, Arnaiz MD, Lucas A, Navarro V, Serrano G, Zaderazjko M, Jeremic B, Guedea F. 2006. Radiation therapy alone in elderly with early stage non-small cell lung cancer. Lung Cancer. 52(2):149-154.

Schiller K, Specht HM, Haller B, Hallqvist D, Devecka M, Becker von Rose A, Combs SE, Pigorsch S. 2017. Correlation between delivered radiation doses to the brainstem or vestibular organ and nausea & vomiting toxicity in patients with head and neck cancers - an observational clinical trial. Radiat Oncol. 12(1):113.

UNSCEAR. 2013. UNSCEAR 2013 Report Vol. II: Sources, Effects and Risks of Ionizing Radiation. Annex B: Effects of radiation exposure of children. New York: UN.
